# Supplementary material for: Graphene-based composite supercapacitor electrodes with diethylene glycol as inter-layer spacer
Source: Royal Society of Chemistry journal article supplement (doi:10.1039/c4ta00905c), 2014-01-01
Supplement: c4ta00905c1.pdf [file c4ta00905c1.pdf]

## Supporting Information

### Graphene Based Composite Supercapacitor Electrodes with Diethylene glycol as Inter-layer Spacer

Yu Yu,<sup>a</sup> YongbinSun,<sup>b</sup> Changyan Cao,<sup>a</sup> Shuliang Yang,<sup>a</sup> Hua Liu,<sup>a</sup> Ping Li,<sup>a</sup> Peipei Huang,<sup>b</sup> Weiguo Song<sup>\*,a</sup>

†Laboratory of Molecular Nanostructures and Nanotechnology, Institute of Chemistry, Chinese Academy of Sciences & Beijing National Laboratory of Molecular Sciences, Beijing, 100190, P. R. China

‡Graduate University of Chinese Academy of Sciences, Beijing, 100049, P. R. China

\**E-mail*: [wsong@iccas.ac.cn](mailto:wsong@iccas.ac.cn)

## Experimental section

**Preparation of Graphene Oxide.** Graphite oxide was prepared by a modified Hummers method. 1.5 g of graphite powder was mixed with 105 mL of 98 wt % sulfuric acid in an ice-bath. After 5 min, 15 mL 85 wt% phosphoric acid was added to undergo another 5-minute agitation. Then, 1 g potassium permanganate ( $\text{KMnO}_4$ ) was slowly added in to stir for 1 h. The flask was transferred into a 35 °C oil-bath for 24 h. A 160 mL portion of deionized water was gradually added into the mixture, and the rate of water addition must be controlled to keep the temperature below 100 °C. The reaction was kept for 30 min, followed by treatment by 10 mL of 30%  $\text{H}_2\text{O}_2$  solution. The resulting bright yellow suspension was diluted by water or EtOH and ultrasonic-treated intensively, and then centrifugated and washed more than 5 times to clean out remnant salt.

**Preparation of DEG/graphene.** A 6 mL portion of 3 mg/mL GO aqueous or alcoholic mucus was added into 54 mL diethylene glycol to form a uniform 0.3 mg/mL brown-colored suspension by vigorous stirring and ultrasonication. The suspension was sealed in a 100 mL Teflon-lined stainless steel autoclave to perform solvothermal process at 150 °C for 10 h. After completion of the solvothermal reaction, the product was washed using absolute ethanol and deionized water several times to remove remnant DEG solvent molecules, then dried in a freezer dryer.

**Characterization.** SEM image was taken on scanning electron microscopy (JEOL-6701F). TEM images and EDS results were taken on transmission electron microscopy (Tecnai G2 F20 U-TWIN). AFM images and cross-section contours were obtained on AFM Nanoscope IIIa. X-ray diffraction (XRD) patterns were recorded on a Rigaku diffractometer (Maxima XRD-7000) using  $\text{Cu K}\alpha$  irradiation. TGA analysis was conducted on a Pyris 1 TGA Differential scanning calorimeter under air atmosphere at heating rate of 10 °C/min. IR, Raman spectra, and XPS information were obtained on Nicolet iN10 MX FT-IR Microscope, Thermo Scientific Raman microscope and ESCALab220i-XL photoelectron spectroscopy respectively. The specific surface area and pore size distribution were measured by BET on an Autosorb-1 analyzer.

**Electrochemical Measurements.** Electrochemical properties of DEG graphene were measured with an alkaline aqueous system (electrolyte: 6 M KOH). For preparing the electrodes of DEG/graphene, 24 mg synthesized materials was mixed with 3 mg acetylene black (Super P) and 3 mg polytetrafluoroethylene (PTFE) binder in a certain amount of ethanol. After an adequate ultrasonication, an obtained uniform suspension was dried to a homogeneous paste to coat on the nickel foam, which was then subjected to a 2 h drying under infrared lamp in the atmosphere. Then the dried electrode was cold-pressed at 4 MPa, followed by a 24 h drying at 80 °C in vacuum to remove ethanol and moisture thoroughly. CV measurement (scanning rates varying from 2 to 200 mV/s) was carried on an electrochemistry workstation (Princeton PARSTAT 2273). In the three-electrode system, a 1 cm  $\times$  1 cm Pt sheet and SCE (saturated calomel electrode) were employed as counter and reference electrodes respectively. GC measurements (current density varying from 0.1 to 20 A/g) and CV measurement (from 2 to 200 mV/s also) were conducted in the form of two-electrode symmetrical coin cell, with a charge-discharge tester (Arbin 2000) and Princeton PARSTAT 2273 respectively. The electrochemical capacitances were obtained both from CV (both two-electrode and three-electrode system) and GC curves. The two-electrode symmetrical coin cells were also used for electrochemical impedance spectroscopy (EIS) measurement on Princeton PARSTAT 2273 in the frequency range of 0.1 – 100 kHz.

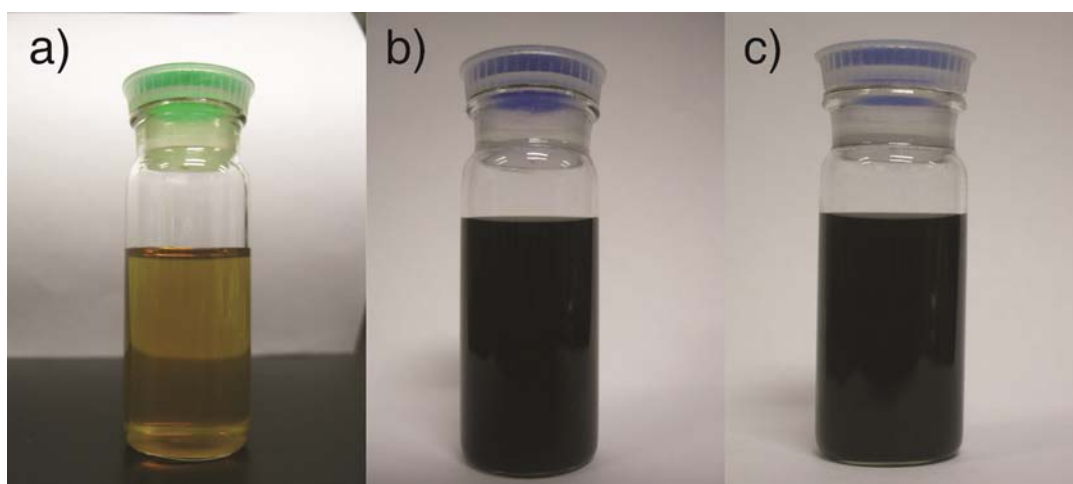

**Figure S1.** Photograph images of (a) GO disperse in diethylene glycol at a concentration of 0.3 mg/mL, DEG/graphene in H<sub>2</sub>O (b) and EtOH (c) at a concentration of 0.2 mg/mL deposited after a month.

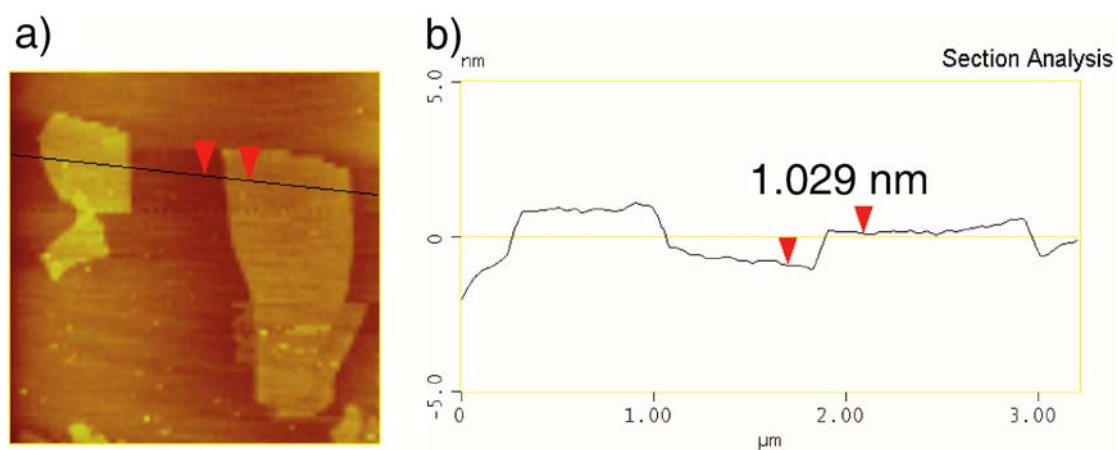

**Figure S2.** (a) AFM image and (b) cross-section contour of an individual GO sheet.

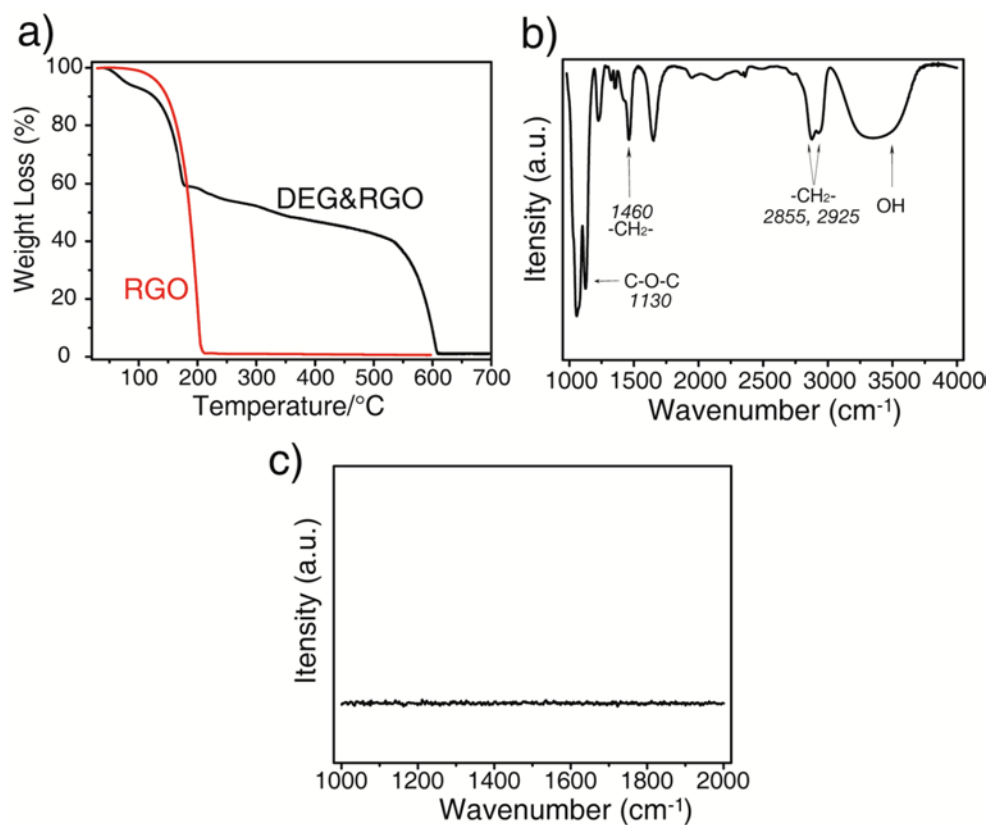

**Figure S3.** (a) TGA results of DEG and DEG-RGO physically mixed DEG&RGO, (b) FTIR spectra and (d) Raman spectroscopy of DEG.

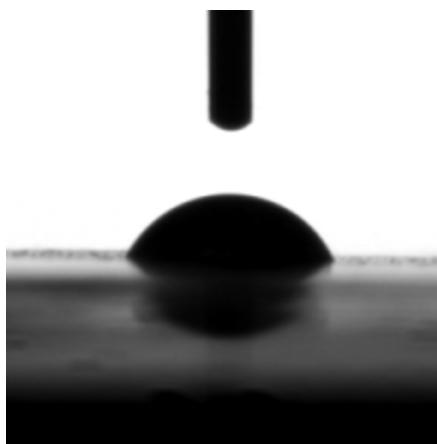

**Figure S4.** The static contact angle of DEG/graphene film and the water shape according to the film

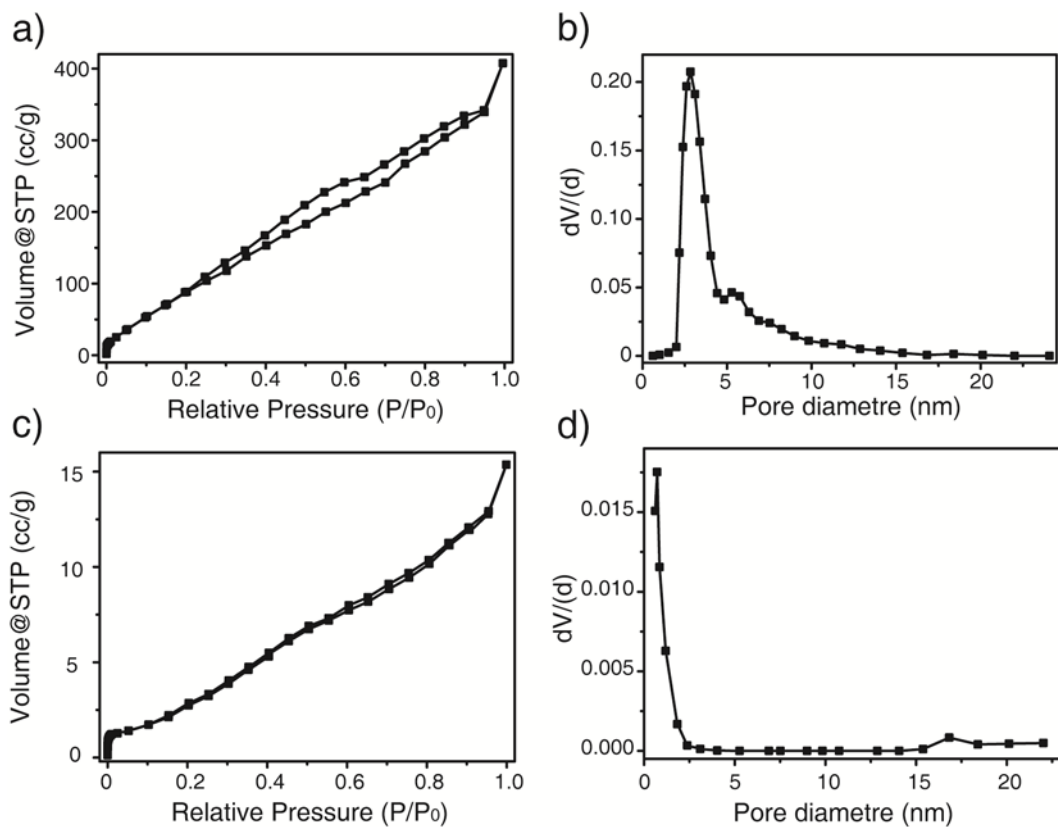

**Figure S5.** N<sub>2</sub> adsorption-desorption isotherm and pore distribution of DEG/graphene (a, b) and pristine GO (c, d) by freeze drying.

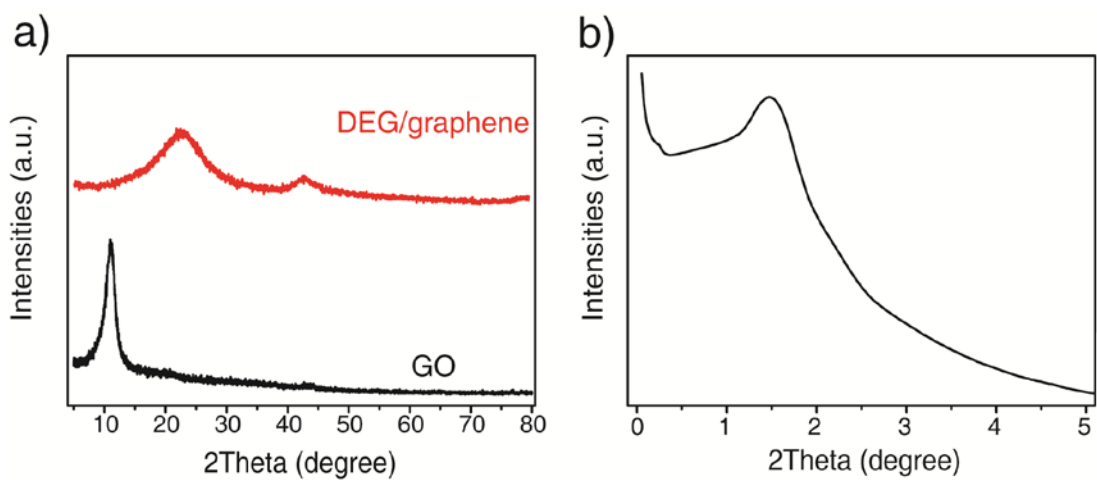

**Figure S6.** (a) WAXRD patterns of DEG/graphene (top) and GO (bottom). (b) SAXS patterns of DEG/graphene.

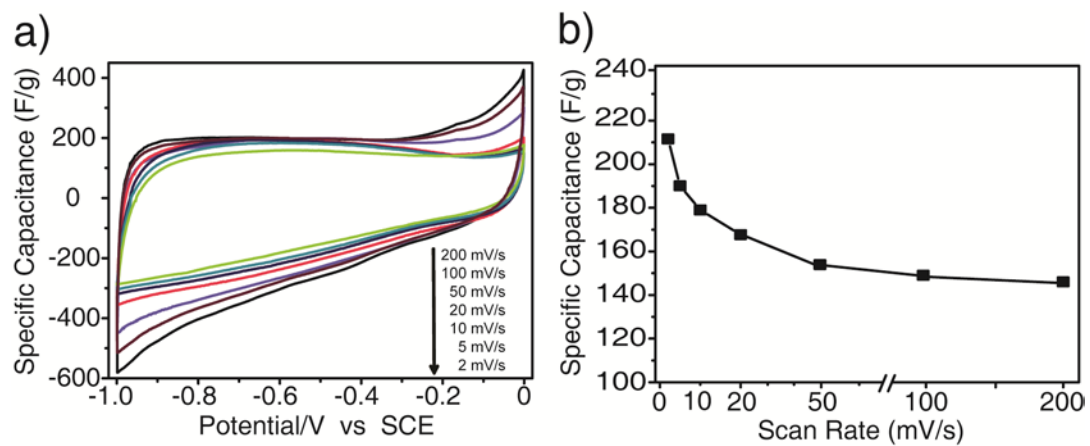

Figure S7. CV curves (a) and the specific capacitances calculated by CV of DEG/graphene at the scanning rate of 2-200 mV/s in the three-electrode system.

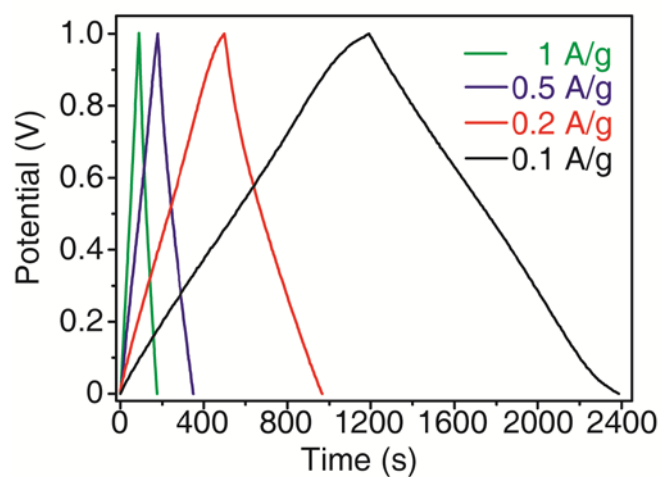

Figure S8. GC curves of DEG/graphene at the current densities of 0.1, 0.2, 0.5, and 1 A/g.

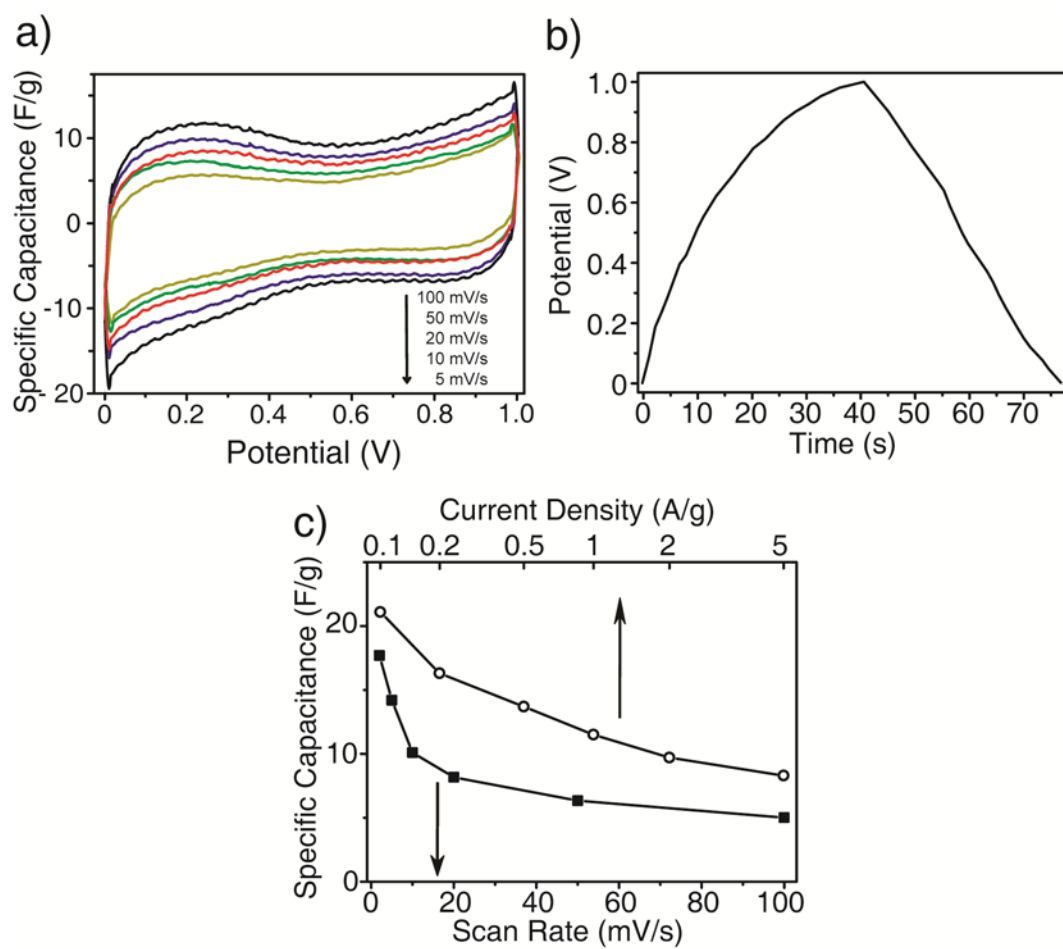

**Figure S9.** (a) CV curves (at the scanning rate of 5-100 mV/s), (b) GC curve at 0.2 A/g, and (c) the specific capacitances of pristine GO calculated by CV (bottom axis) and GC method (top axis).

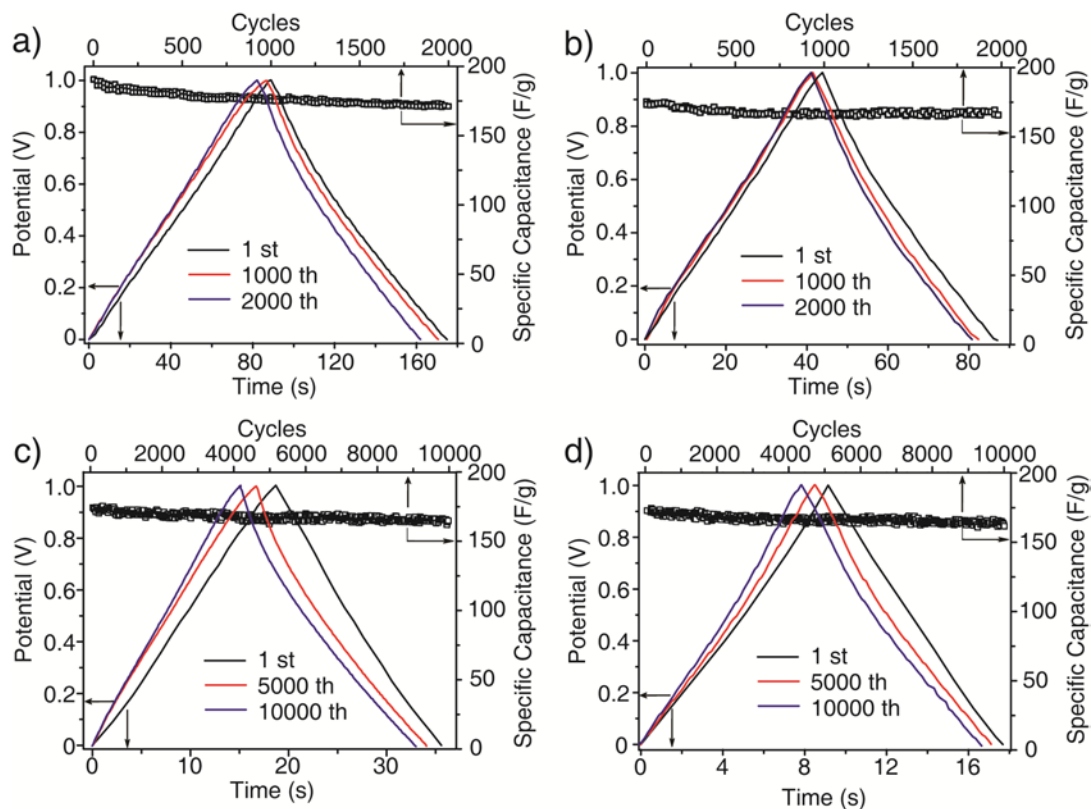

**Figure S10.** GC curves (left and bottom axes) of the 1st, 1000th, and 2000th at 1 A/g (a), 2 A/g (b), or 1st, 5000th, and 10000th at 5 A/g (c), and 10 A/g (d), and the retention of Cs at the corresponding current densities, respectively.

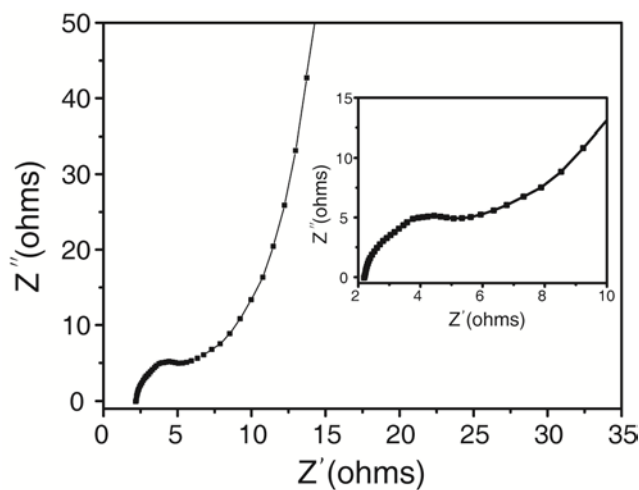

**Fig. S11** Nyquist plots of two-electrode symmetrical coin cells of pristine GO supercapacitors electrodes. The inset is the close-up EIS image in the high frequency region.
